# Supplementary material for: C-IFS-CB05-BASCOE: stratospheric chemistry in the Integrated ForecastingSystem of ECMWF
Source: Copernicus journal article supplement (doi:10.5194/gmd-9-3071-2016), 2016-09-06
Supplement: Supplementary file 2 [file gmd-9-3071-2016-supplement.pdf]

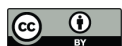

*Supplement of*

## **C-IFS-CB05-BASCOE: stratospheric chemistry in the Integrated Forecasting System of ECMWF**

**Vincent Huijnen et al.**

*Correspondence to:* Vincent Huijnen ([huijnen@knmi.nl](mailto:huijnen@knmi.nl))

The copyright of individual parts of the supplement might differ from the CC-BY 3.0 licence.

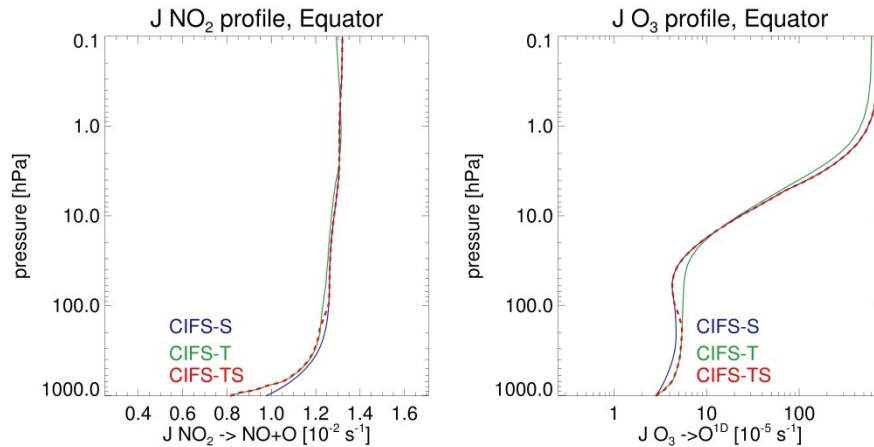

Figure S1. Instantaneous photolysis rates for  $\text{NO}_2$  and  $\text{O}_3$  at  $0^\circ\text{N}$ ,  $180^\circ\text{W}$ , on 1 October 2008, 0 UTC. Solid blue (CIFS-S) refers to the stratospheric parameterization, solid green (CIFS-T) to tropospheric, and dashed red (CIFS-TS) to the merged profile of the rate.

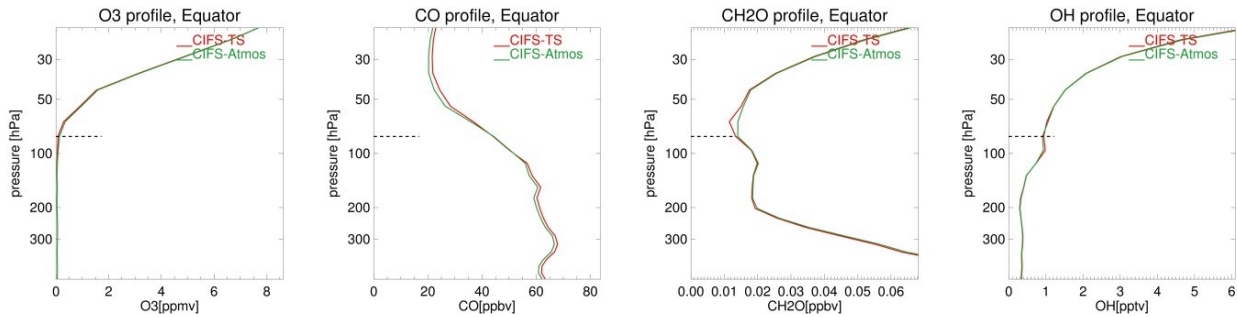

Figure S2. Instantaneous profiles of  $\text{O}_3$ ,  $\text{CO}$ ,  $\text{CH}_2\text{O}$  and  $\text{OH}$  at  $0^\circ\text{N}$ ,  $180^\circ\text{W}$ , on 1 October 2008, 0 UTC, for runs C-IFS-TS (red) and C-IFS-Atmos (green). The dashed line denotes the chemical tropopause level associated with the switch in the chemistry mechanism.

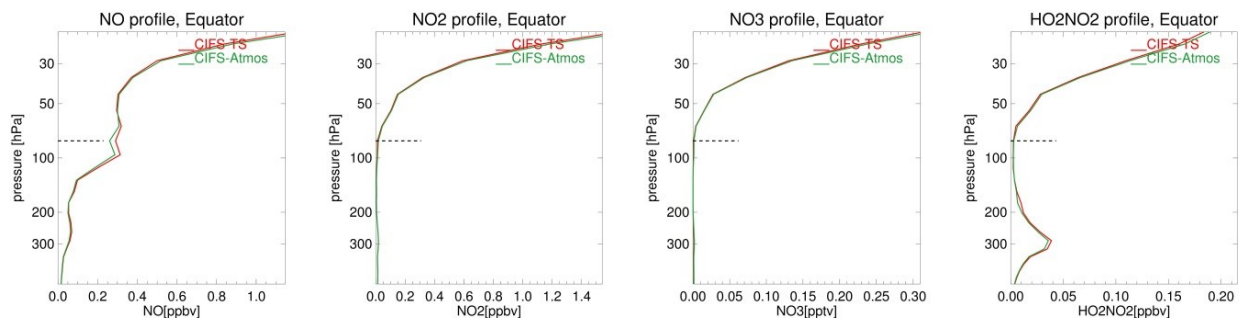

Figure S3. Same as Figure S2 but now showing  $\text{NO}$ ,  $\text{NO}_2$ ,  $\text{NO}_3$  and  $\text{HO}_2\text{NO}_2$ .

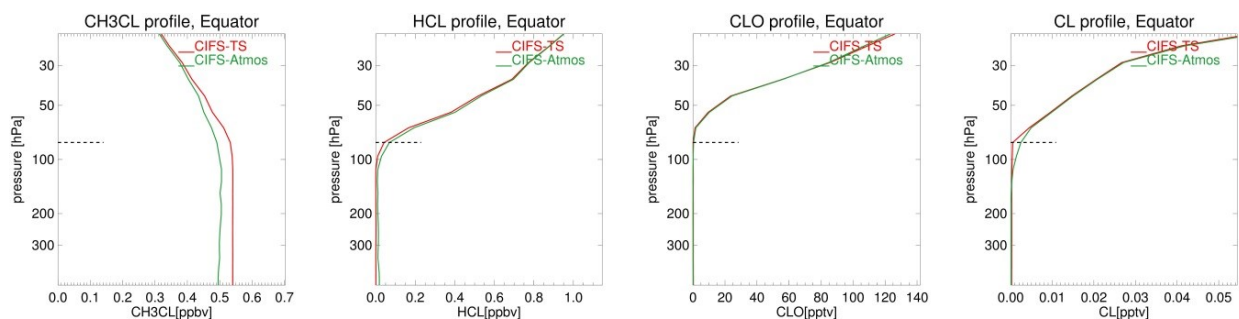

Figure S4. Same as Figure S2 but now showing  $\text{CH}_3\text{Cl}$ ,  $\text{HCl}$ ,  $\text{ClO}$  and  $\text{Cl}$ . Note that for these trace gases in C-IFS-TS only transport is activated in the troposphere.

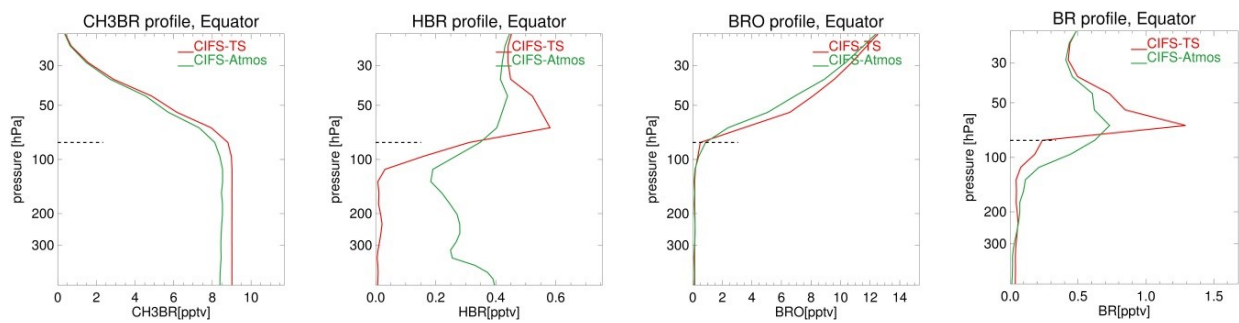

Figure S5. Same as Figure S2 but now showing  $\text{CH}_3\text{Br}$ ,  $\text{HBr}$ ,  $\text{BrO}$  and  $\text{Br}$ . Note that for these trace gases in C-IFS-TS only transport is activated in the troposphere.

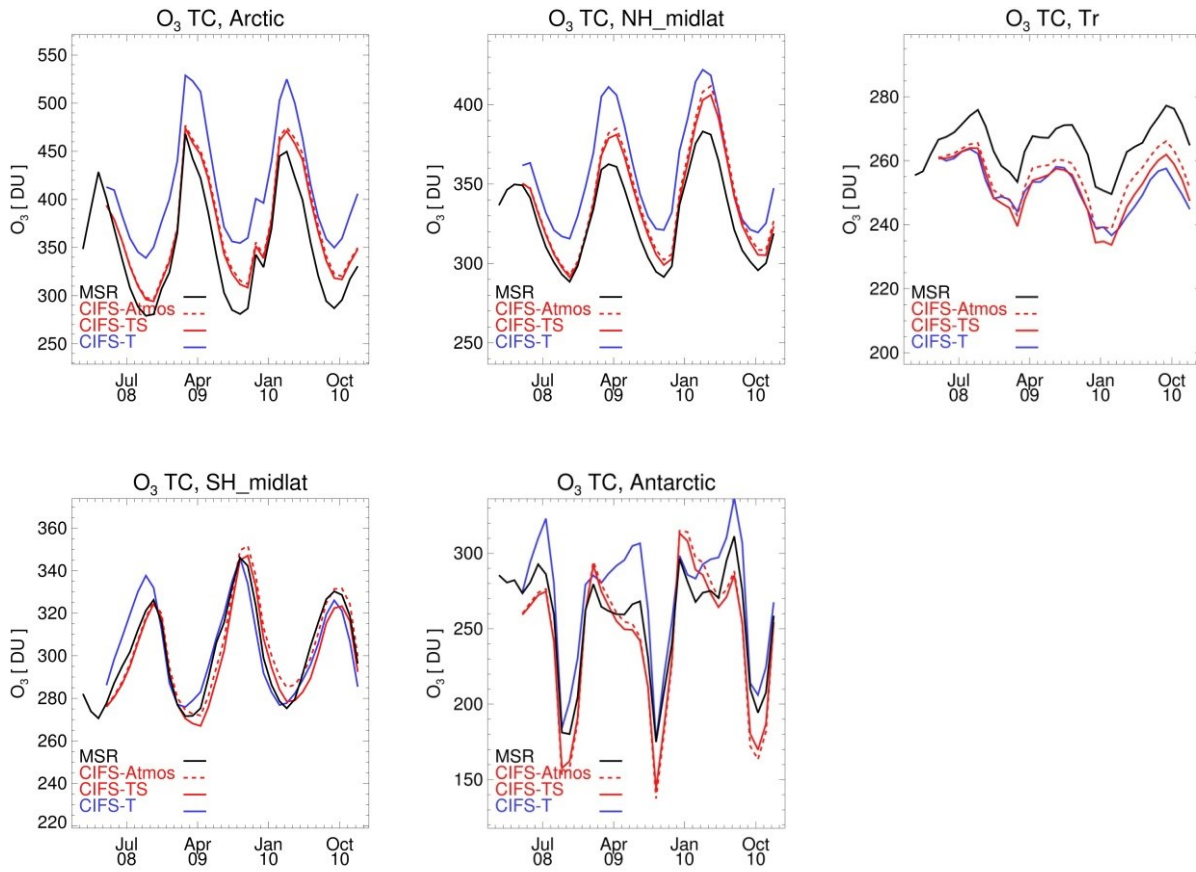

Figure S6. Evaluation of C-IFS-TS (red, solid), C-IFS-Atmos (red, dashes) and CIFS-T (blue) monthly mean  $O_3$  total columns in Dobson Units against the Multi-Sensor Reanalysis for the Arctic ( $90^\circ\text{N}$ - $70^\circ\text{N}$ ), Northern Hemisphere mid-latitudes ( $60^\circ\text{N}$ - $30^\circ\text{N}$ ), tropics ( $30^\circ\text{N}$ - $30^\circ\text{S}$ ), Southern Hemisphere mid-latitudes ( $30^\circ\text{S}$ - $60^\circ\text{S}$ ) and Antarctica ( $70^\circ\text{S}$ - $90^\circ\text{S}$ ).

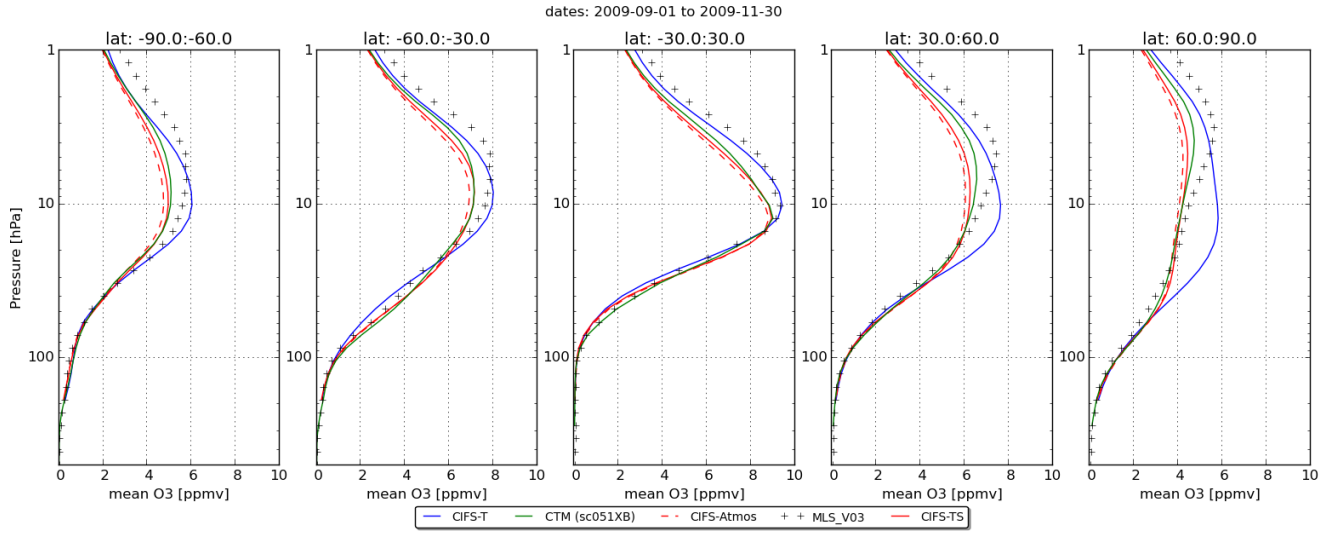

Figure S7. Zonal mean profiles of stratospheric  $O_3$  using MLS observations (black symbols) and co-located output of BASCOE-CTM (green lines), C-IFS-TS (red solid lines) and C-IFS-Atmos (red dashed lines). The zonal means are shown separately on five columns corresponding to the latitude bands  $90^\circ\text{S}$ - $60^\circ\text{S}$ ,  $60^\circ\text{S}$ - $30^\circ\text{S}$ ,  $30^\circ\text{S}$ - $30^\circ\text{N}$ ,  $30^\circ\text{N}$ - $60^\circ\text{N}$  and  $60^\circ\text{N}$ - $90^\circ\text{N}$ , respectively.

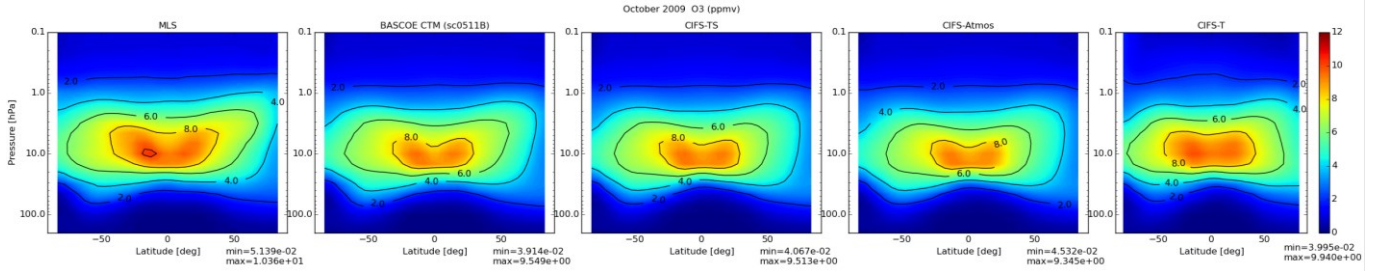

Figure S8. Zonal mean stratospheric  $O_3$  (units ppmv) for October 2009 using MLS observations (first column) and co-located output of BASCOE-CTM (second), C-IFS-TS (third), C-IFS-Atmos (fourth) and C-IFS-T (fifth).
